# Supplementary material
Source: PubMed Central journal article supplement (PMC4400765)
Supplement: JCM.03375-14_zjm999094197so1.pdf [file JCM.03375-14_zjm999094197so1.pdf]

- 1 **Table S1.** Bias between nominal and measured concentrations the highest concentration of
- 2 standard from each manufacturer

| Standard    | BioRad                               | RainDance                            | Altona                               | Abbott                               | Qiagen                               |
|-------------|--------------------------------------|--------------------------------------|--------------------------------------|--------------------------------------|--------------------------------------|
|             | Mean <sub>log10(IU/ml)</sub><br>(SD) | Mean <sub>log10(IU/ml)</sub><br>(SD) | Mean <sub>log10(IU/ml)</sub><br>(SD) | Mean <sub>log10(IU/ml)</sub><br>(SD) | Mean <sub>log10(cp/ml)</sub><br>(SD) |
| AcroMetrix  | -0.55 (0.07)                         | -0.64 (0.07)                         | 0.17 (0.08)                          | -0.21 (0.06)                         | -0.58 (0.02)                         |
| SeraCare    | 0.22 (0.01)                          | 0.37 (0.41)                          | 0.71 (0.06)                          | -0.15 (0.14)                         | 0.29 (0.07)                          |
| ZeptoMetrix | -1.04 (0.06)                         | -1.07 (0.22)                         | -0.75 (0.12)                         | -0.89 (0.11)                         | -0.29 (0.002)                        |

3

4

5 **Table S2.** Bias between nominal and measured concentrations the second highest concentration  
 6 of standard from each manufacturer

| Standard    | BioRad                               | RainDance                            | Altona                               | Abbott                               | Qiagen                               |
|-------------|--------------------------------------|--------------------------------------|--------------------------------------|--------------------------------------|--------------------------------------|
|             | Mean <sub>log10(IU/ml)</sub><br>(SD) | Mean <sub>log10(IU/ml)</sub><br>(SD) | Mean <sub>log10(IU/ml)</sub><br>(SD) | Mean <sub>log10(IU/ml)</sub><br>(SD) | Mean <sub>log10(cp/ml)</sub><br>(SD) |
| AcroMetrix  | -0.34 (0.16)                         | -0.52 (0.10)                         | 0.15 (0.13)                          | -0.08 (0.12)                         | -0.63 (0.03)                         |
| SeraCare    | 0.26 (0.06)                          | 0.07 (0.08)                          | 0.43 (0.13)                          | 0.08 (0.09)                          | 0.19 (0.04)                          |
| ZeptoMetrix | -1.05 (0.15)                         | -1.18 (0.24)                         | -0.60 (0.04)                         | -0.93 (0.17)                         | -0.36 (0.10)                         |

7  
 8  
 9

10 **Table S3.** Bias between nominal and measured concentrations the lowest concentration of  
 11 standard from each manufacturer.

| Standard    | BioRad                               | RainDance <sup>a</sup>               | Altona                               | Abbott                               | Qiagen                               |
|-------------|--------------------------------------|--------------------------------------|--------------------------------------|--------------------------------------|--------------------------------------|
|             | Mean <sub>log10(IU/ml)</sub><br>(SD) | Mean <sub>log10(IU/ml)</sub><br>(SD) | Mean <sub>log10(IU/ml)</sub><br>(SD) | Mean <sub>log10(IU/ml)</sub><br>(SD) | Mean <sub>log10(cp/ml)</sub><br>(SD) |
| AcroMetrix  | -0.52 (0.02) <sup>b</sup>            | -0.60 (0.35) <sup>b</sup>            | -0.05 (0.40)                         | -0.04 (0.29)                         | -0.45 (0.04)                         |
| SeraCare    | 0.31 (0.20)                          | 0.17 (0.37)                          | 0.80 (0.17)                          | -0.14 (0.16)                         | 0.24 (0.14)                          |
| ZeptoMetrix | -0.61 (0.20) <sup>b</sup>            |                                      | -0.96 (0.37) <sup>b</sup>            | -0.98 (0.31)                         | -0.34 (0.24) <sup>b</sup>            |

12 <sup>a</sup> No replicates detected for ZeptoMetrix from RainDance.

13 <sup>b</sup> N<4 replicates detected and used.

14

15

16

17 **Table S4.** Regression parameter estimates when comparing real-time PCR measures against

18 nominal values provided by manufacturers. Regression lines were tested against the identity line.

| Standard    | Assay  | R <sup>2</sup> | Intercept (95% CI)   | P-value testing intercept=0 <sup>a</sup> | Slope (95% CI)    | P-value testing slope=1 <sup>b</sup> |
|-------------|--------|----------------|----------------------|------------------------------------------|-------------------|--------------------------------------|
| AcroMetrix  | Abbott | 0.96           | 0.19 (-0.29, 0.68)   | 0.40                                     | 0.91 (0.78, 1.05) | 0.19                                 |
|             | Altona | 0.95           | -0.30 (-0.97, 0.37)  | 0.34                                     | 1.11 (0.92, 1.30) | 0.21                                 |
|             | Qiagen | 0.99           | -0.31 (-0.52, -0.10) | <.01                                     | 0.94 (0.88, 0.99) | 0.03                                 |
| SeraCare    | Abbott | 0.96           | -0.05 (-0.56, 0.46)  | 0.84                                     | 0.99 (0.86, 1.13) | 0.91                                 |
|             | Altona | 0.94           | 0.82 (0.21, 1.44)    | 0.01                                     | 0.95 (0.79, 1.11) | 0.53                                 |
|             | Qiagen | 0.99           | 0.15 (-0.13, 0.43)   | 0.26                                     | 1.02 (0.95, 1.10) | 0.49                                 |
| ZeptoMetrix | Abbott | 0.95           | -1.10 (-1.71, -0.49) | <.01                                     | 1.05 (0.88, 1.21) | 0.54                                 |
|             | Altona | 0.94           | -1.09 (-1.87, -0.32) | 0.01                                     | 1.09 (0.89, 1.29) | 0.34                                 |
|             | Qiagen | 0.98           | -0.42 (-0.78, -0.06) | 0.03                                     | 1.03 (0.92, 1.14) | 0.58                                 |

19 <sup>a</sup> Testing whether the intercept is statistically different from 0.20 <sup>b</sup> Testing whether the slope is statistically different from 1.

21

22

23

24

25

26

27

28 **Table S5.** Regression parameter estimates when comparing real-time PCR measures against the  
29 average measure made by ddPCRs. Regression lines were tested against the identity line.

| Standard    | Assay  | R <sup>2</sup> | Intercept (95% CI)  | P-value testing intercept=0 <sup>a</sup> | Slope (95% CI)    | P-value testing slope=1 <sup>b</sup> |
|-------------|--------|----------------|---------------------|------------------------------------------|-------------------|--------------------------------------|
| AcroMetrix  | Abbott | 0.95           | 0.57 (0.13, 1.02)   | 0.02                                     | 0.94 (0.80, 1.09) | 0.38                                 |
|             | Altona | 0.95           | 0.16 (-0.44, 0.75)  | 0.57                                     | 1.15 (0.95, 1.34) | 0.12                                 |
|             | Qiagen | 0.97           | 0.32 (-0.02, 0.67)  | 0.07                                     | 0.96 (0.84, 1.07) | 0.40                                 |
| SeraCare    | Abbott | 0.93           | -0.07 (-0.80, 0.66) | 0.83                                     | 0.93 (0.75, 1.10) | 0.37                                 |
|             | Altona | 0.97           | 0.68 (0.24, 1.12)   | <.01                                     | 0.92 (0.81, 1.03) | 0.12                                 |
|             | Qiagen | 0.99           | 0.06 (-0.25, 0.37)  | 0.69                                     | 0.97 (0.89, 1.05) | 0.41                                 |
| ZeptoMetrix | Abbott | 0.94           | 0.19 (-0.58, 0.95)  | 0.57                                     | 0.99 (0.75, 1.23) | 0.91                                 |
|             | Altona | 0.97           | 0.97 (0.49, 1.46)   | <.01                                     | 0.81 (0.66, 0.96) | 0.02                                 |
|             | Qiagen | 0.99           | -0.04 (-0.41, 0.34) | 0.82                                     | 1.02 (0.90, 1.14) | 0.68                                 |

30 <sup>a</sup> Testing whether the intercept is statistically different from 0.

31 <sup>b</sup> Testing whether the slope is statistically different from 1.

32

33

34

35

36

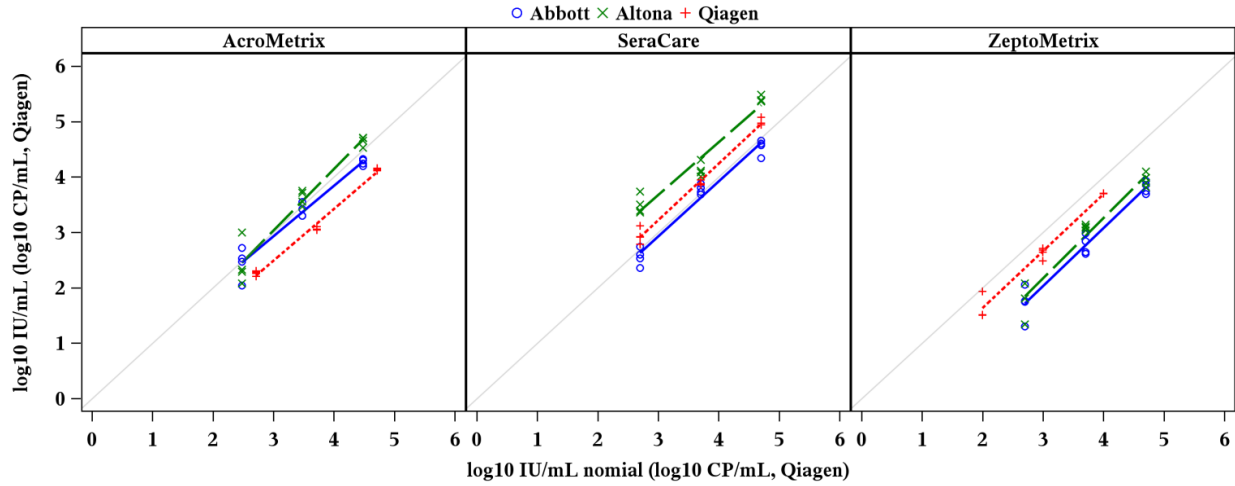

37  
38  
39  
40

**Figure S1.** Regression analysis of real-time PCR measures compared against nominal values stratified by standard

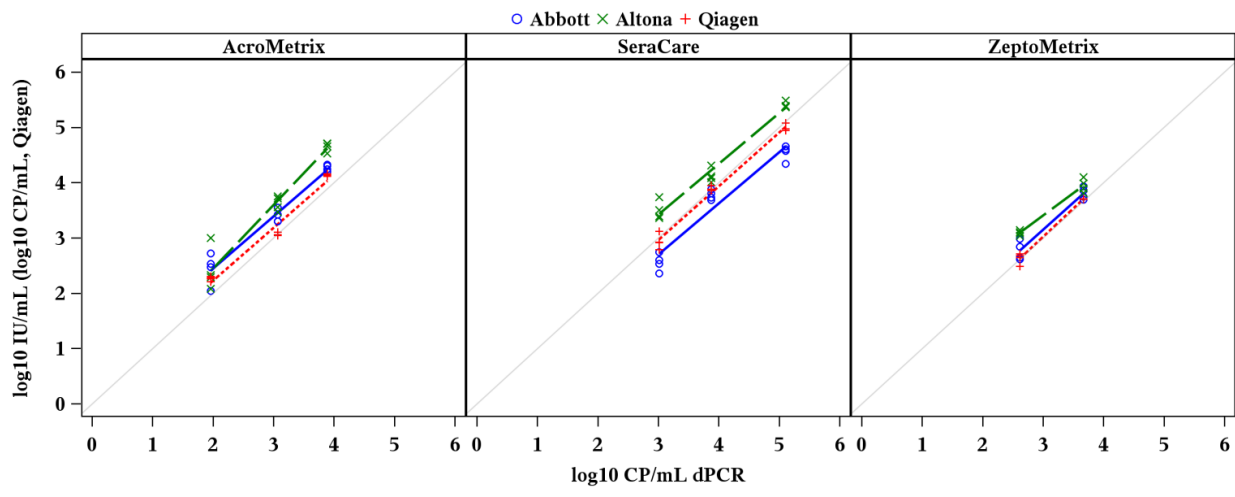

41  
42  
43  
44  
45

**Figure S2.** Regression analysis of real-time PCR measures compared against the average ddPCR measure stratified by standard
